# Supplementary material for: Illumina MiSeq sequencing reveals the community composition of NirS-Type and NirK-Type denitrifiers in Zhoucun reservoir – a large shallow eutrophic reservoir in northern China
Source: Royal Society of Chemistry journal article supplement (doi:10.1039/c6ra18017e), 2016-01-01
Supplement: c6ra18017e1.pdf [file c6ra18017e1.pdf]

## Figure llegend

**Figure S1.** Taxonomic distributions of surface sediment sequences based on NirS-Type and NirK-Type denitrifiers in Zhoucun reservoir. (A) Distributions of bacterial phyla of surface sediment based on NirS-Type denitrifier; (B) Distributions of bacterial Proteobacteria of surface sediment based on NirS-Type denitrifier; (C) Distributions of  $\beta$ -Proteobacteria of surface sediment based on NirS-Type denitrifier; (D) Distributions of *Dechloromonas* of surface sediment based on NirS-Type denitrifier; (E) Distributions of bacterial phyla of surface sediment based on NirK-Type denitrifier; (F) Distributions of bacterial genus of surface sediment based on NirK-Type denitrifier (note the change in x-axis scale).

**Figure S2.** OTUs distributions of profile of water body and surface sediment according to Venn analysis in enhanced and control systems, respectively. (A, B, C, D, represent the OTUs distributions in control system; a, b, c, d, represent the OTUs distributions in enhanced system).

**Figure S3.** Cluster analysis of OTUs profile of surface sediment for NirS-Type and NirK-Type denitrifiers according to Bray Curtis distance (the average linkage) in Zhoucun reservoir. (A, Cluster analysis based on NirS-Type denitrifier; B, Cluster analysis based on NirK-Type denitrifier).

**Figure S4.** Taxonomic distributions of surface sediment sequences based on NirS-Type and NirK-Type denitrifiers during the whole experimental period in Zhoucun reservoir. (A) Distributions of bacterial for NirS-Type denitrifier based on genus level; (B) Distributions of bacterial for NirK-Type denitrifier based on species.

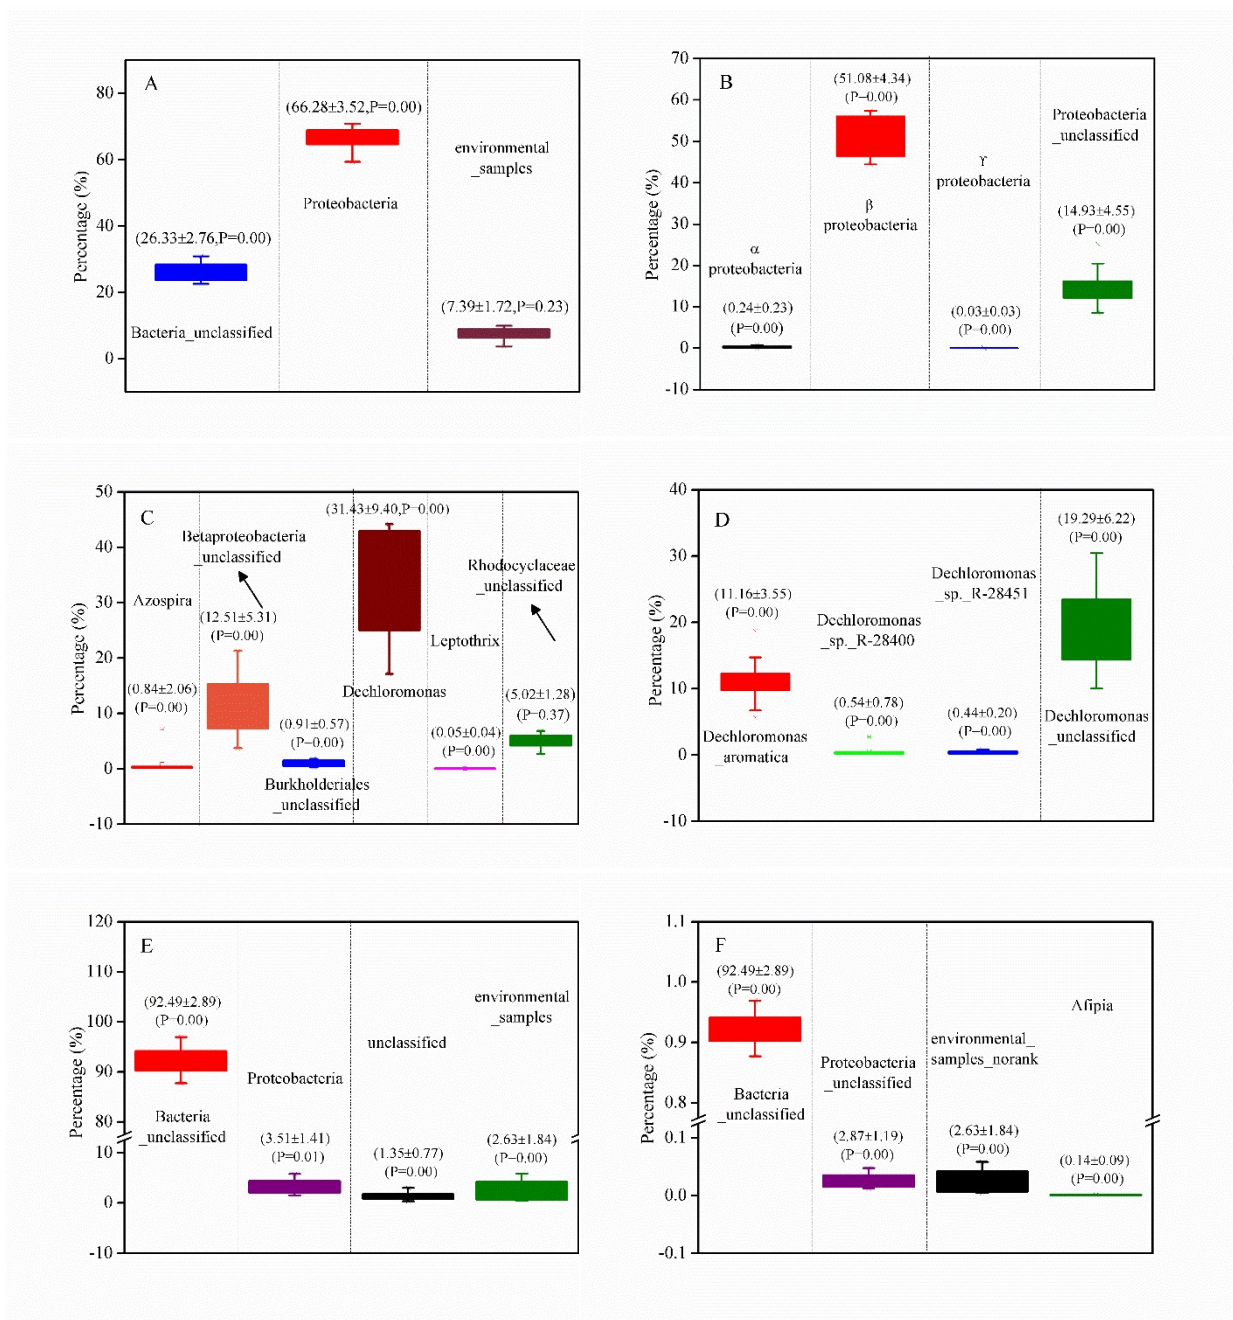

**Figure S1**

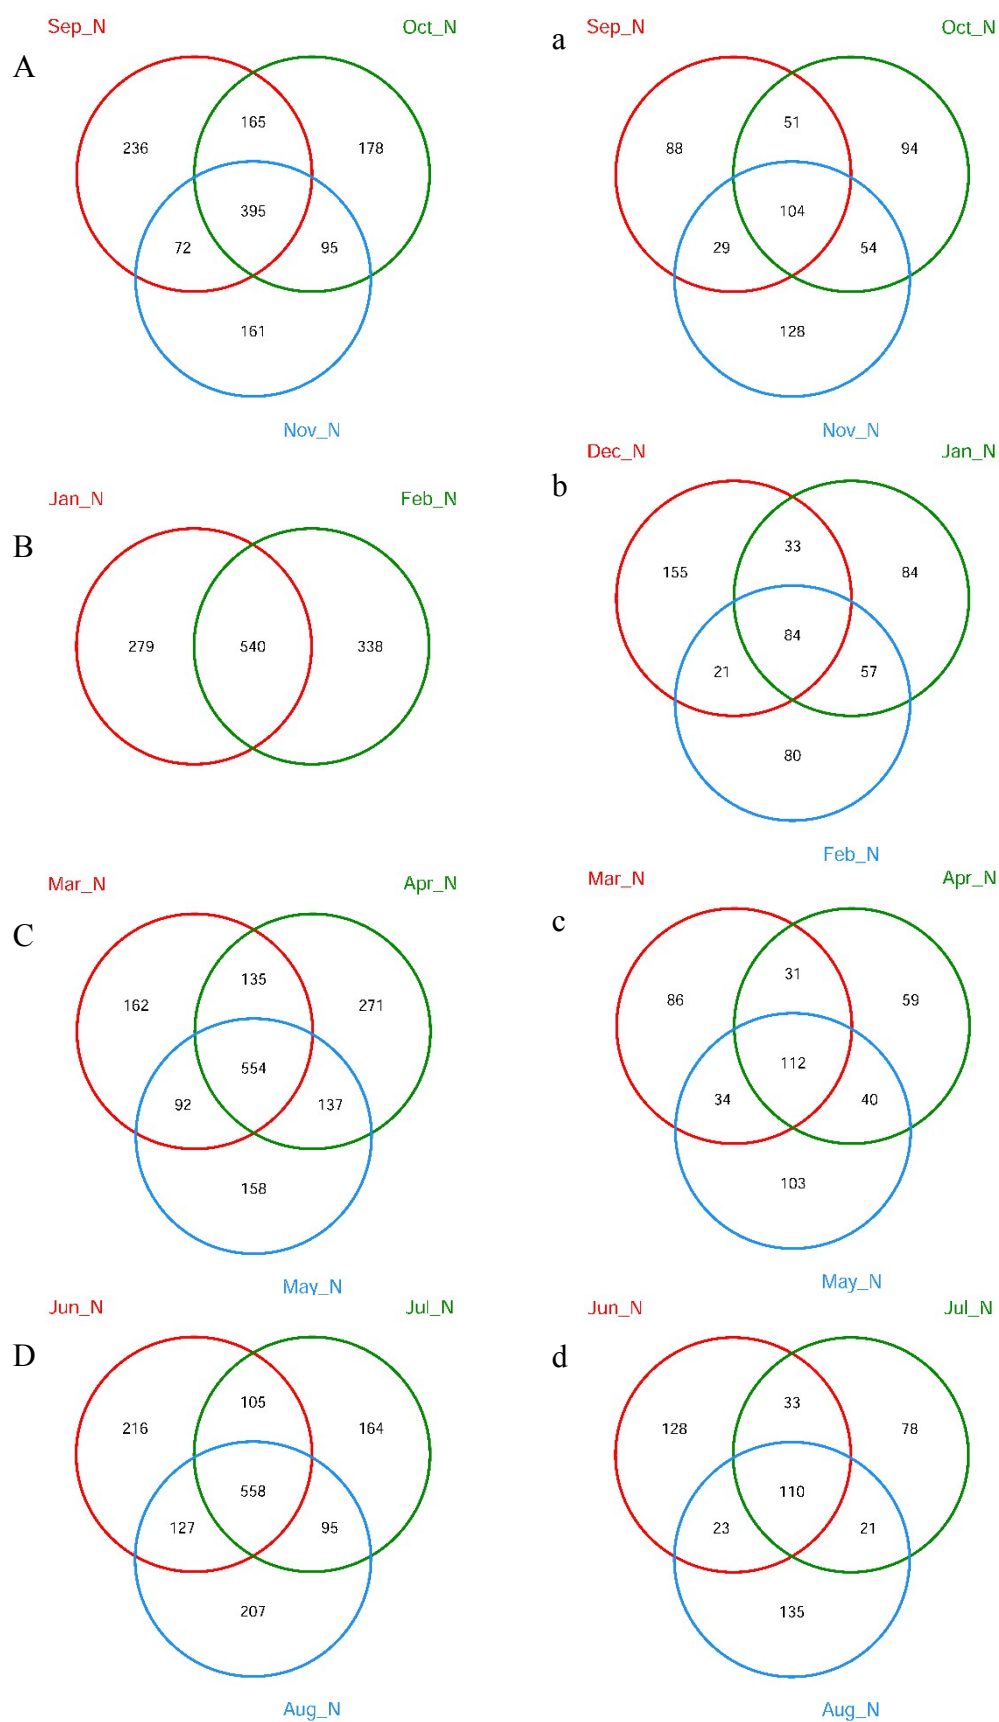

**Figure S2.**

A

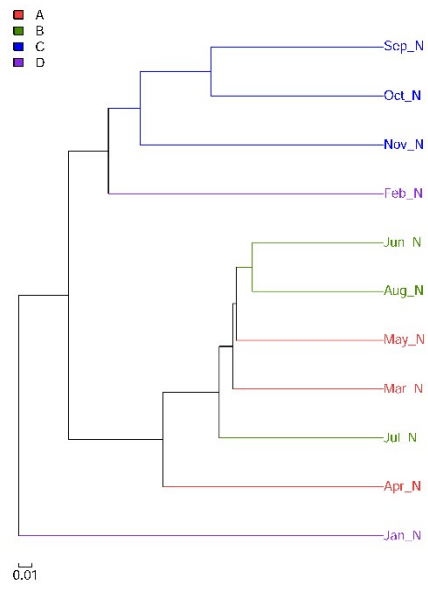

B

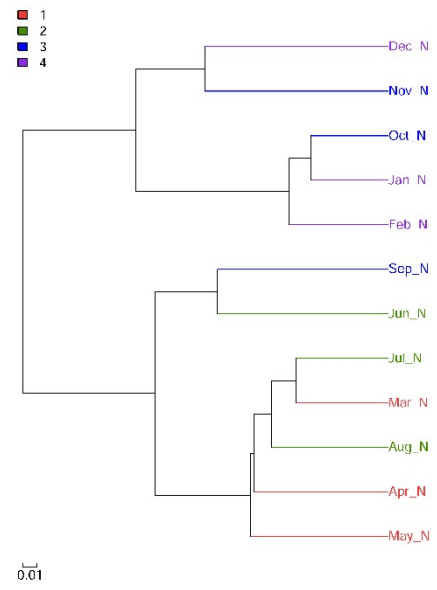

**Figure S3.**



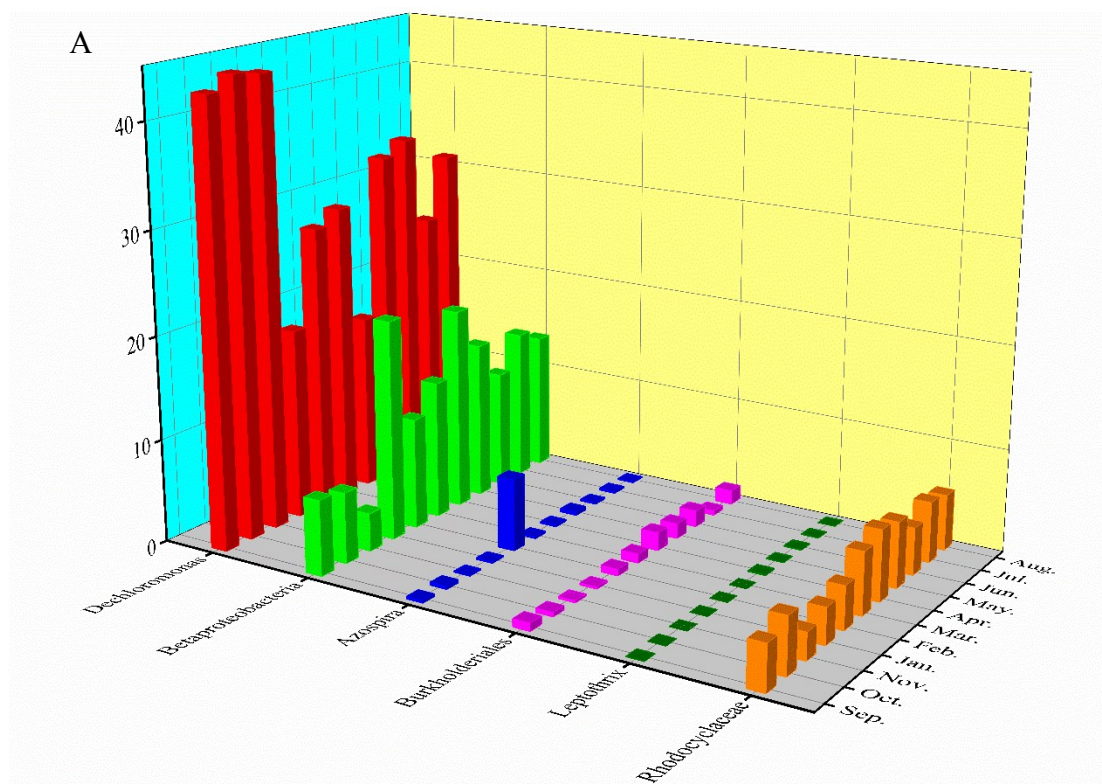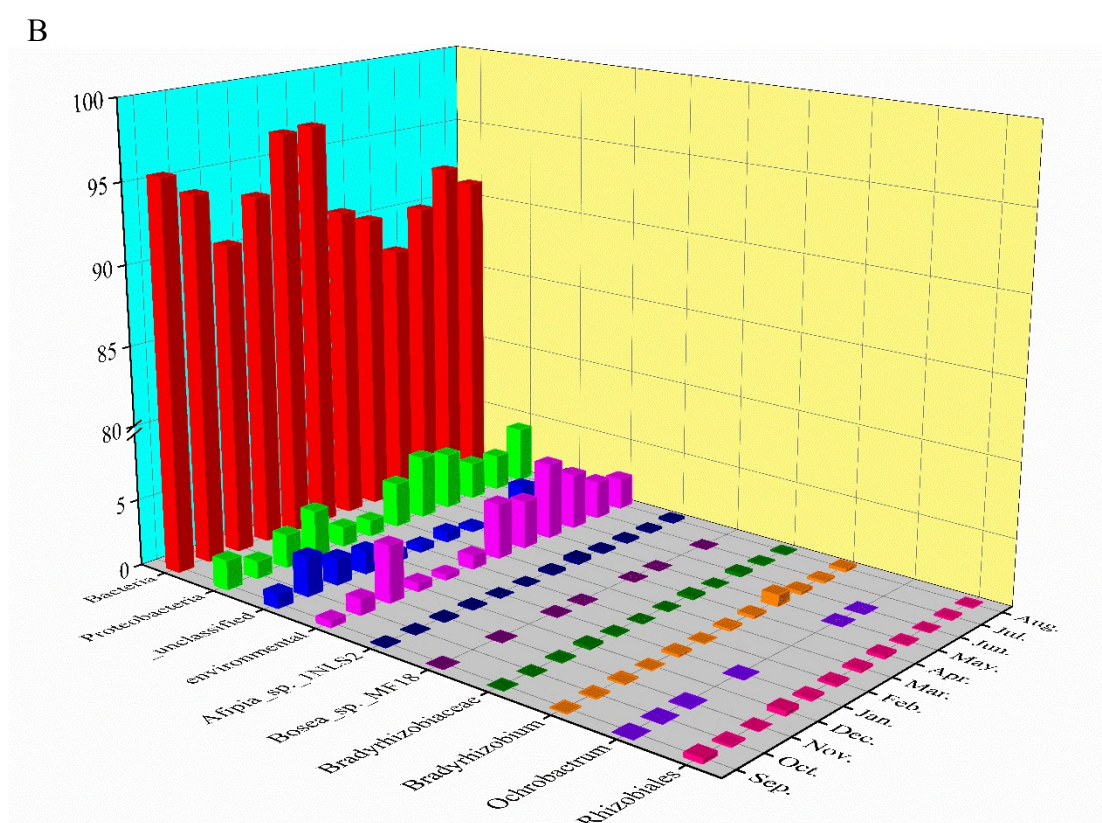

**Figure S4.**

**Table S1.** The variations of surface sediment denitrification rate from Sep. (2014) to Aug. (2015) in Zhoucun Reservoir ecosystem.

|        | System | Mean   | S.D   |
|--------|--------|--------|-------|
| Autumn | Sep.   | 73.94  | 16.73 |
|        | Oct.   | 46.44  | 6.89  |
|        | Nov.   | 473.10 | 16.62 |
| Winter | Dec.   | 336.07 | 17.69 |
|        | Jan.   | 27.31  | 8.88  |
|        | Feb.   | 44.04  | 0.59  |
| Spring | Mar.   | 60.85  | 15.31 |
|        | Apr.   | 83.38  | 11.44 |
|        | May.   | 115.49 | 21.80 |
| Summer | Jun.   | 3.72   | 1.83  |
|        | Jul.   | 3.75   | 1.63  |
|        | Aug.   | 9.49   | 0.53  |

Note, Denitrification rate,  $\text{nmolN}_2/(\text{gdw}\cdot\text{hr})$ ; the background denitrification rate was measured using the acetylene inhibition technique; S.D, Standard Deviation.

**Table S2** Pearson correlation between sediment parameters and potential influencing factors in Zhoucun Reservoir during one year.

| Variations | STN    | STP    | MC     | DR     | AD     | NirS  | T |
|------------|--------|--------|--------|--------|--------|-------|---|
| STN        | 1      |        |        |        |        |       |   |
| STP        | 0.324  | 1      |        |        |        |       |   |
| MC         | -0.239 | -0.397 | 1      |        |        |       |   |
| DR         | -0.566 | -0.194 | -0.013 | 1      |        |       |   |
| AD         | 0.134  | -0.409 | 0.184  | -0.350 | 1      |       |   |
| NirS       | 0.112  | -0.456 | 0.066  | -0.480 | 0.641* | 1     |   |
| T          | 0.066  | -0.324 | -0.265 | 0.261  | 0.665* | 0.325 | 1 |

Note, STN, TN (sediment); STP, TP (sediment); NirS, NirS function genus; \* means Correlation is significant at the 0.05 level (2-tailed).
